# Supplementary material
Source: ML conference proceedings conference paper supplement (https://proceedings.mlr.press/v137/jung20a.html)
Supplement: Supplementary file [file jung20a-supp.pdf]

# Appendix

## A Parameterizaion of likelihood function for DeepAR

This paper follows the parameterization methods described in the references [6, 17] for  $l_\theta$  of DeepAR. To be specific, we parameterize the model for a Gaussian likelihood distribution by using two affine functions:

$$\begin{aligned} l_\theta(z|\mathbf{h}) &= \mathcal{N}(z; \mu_\theta(\mathbf{h}), \sigma_\theta(\mathbf{h})) \\ \mu_\theta(\cdot) &= \mathbf{w}_\mu^T \mathbf{h} + b_\mu, \quad \sigma_\theta(\cdot) = \text{softplus}(\mathbf{w}_\sigma^T \mathbf{h} + b_\sigma) \end{aligned} \quad (7)$$

where  $\mathcal{N}(\cdot)$  is a likelihood function of normal distribution. The negative binomial distribution is parameterized as follows:

$$\begin{aligned} l_\theta(z|\mathbf{h}) &= \mathcal{BN}(z; \mu_\theta(\mathbf{h}), \alpha_\theta(\mathbf{h})) = \frac{\Gamma(z+1/\alpha)}{\Gamma(z+1)\Gamma(1/\alpha)} \left(\frac{1}{1+\alpha\mu}\right)^{\frac{1}{\alpha}} \left(\frac{\alpha\mu}{1+\alpha\mu}\right)^z \\ \mu_\theta(\cdot) &= \text{softplus}(\mathbf{w}_\mu^T \mathbf{h} + b_\mu), \quad \alpha_\theta(\cdot) = \text{softplus}(\mathbf{w}_\alpha^T \mathbf{h} + b_\alpha) \end{aligned} \quad (8)$$

## B Estimation of joint distribution of future time series for DeepState

Unlike the auto-regressive models such as DeepAR, DeepState uses the observation values to compute the posterior distribution of latent state at each time step. Especially, DeepState integrates Kalman filtering [14, 15] into the model to estimate the analytical solution for the posterior:  $p(\mathbf{l}_T^{(i)} | z_{1:T}^{(i)})$ . From the estimated posterior, DeepState predict the conditional joint distribution of future time series as follows:

$$\begin{aligned} P(z_{T+1:T+\tau}^{(i)} | z_{1:T}^{(i)}, \mathbf{x}_{1:T+\tau}^{(i)}) &= \prod_{t=T+1}^{T+\tau} p(z_t^{(i)} | z_{1:t-1}^{(i)}; \Theta_{0:t-1}^{(i)}) \\ &= \int p(\mathbf{l}_T^{(i)} | z_{1:T}^{(i)}; \Theta_{0:T}^{(i)}) \left[ \prod_{t=T+1}^{T+\tau} p(z_t^{(i)} | \mathbf{l}_t^{(i)}; \Theta_t^{(i)}) p(\mathbf{l}_t^{(i)} | \mathbf{l}_{t-1}^{(i)}; \Theta_t^{(i)}) \right] d\mathbf{l}_{T:T+\tau}^{(i)}. \end{aligned} \quad (9)$$

Although the joint distribution is analytically tractable, it is evaluated by Monte Carlo approaches for the sake of implementation convenience following the reference paper.

## C Additional Results

The mean and standard deviation value reported in following tables and figures are calculated over hyperparameter samples.

### C.1 DeepAR

To illstrate the effect of important hyperparameters to the performance of DeepAR, we report the result with different scaling methods, output distribution, context length, and number of RNN layers. As reported in Section 4.1, applying scaling method is essential to achieve desirable performance. The longer the context length is, the better the RMSE and the mean NQL are. The output distribution and number of RNN layers slightly varies the performance: negative binomial distribution is shown to be better fits to our EC dataset, and the performance drops as the number of layers increases probably due to the overfitting.

### C.2 DeepState

Primarily, we address the performance of DeepState with fully-learnable (FL) SSMs and partially-learnable (PL) SSMs. We perform experiments with different context lengths and report each metrics's best mean score in Table C.2 and Fig. C.2. The performance of both models approximately

converges after 56 days of context lengths. The model with FL SSMs shows inaccurate and imprecise performance, and this appears to be a problem of the inherent lack of representation power in the model and non-identifiability problem [18, 19] caused by SSMs’ extreme flexibility.

Secondly, we compare the DeepState with different scaling methods: mean and median scalers. The performance degrades significantly when the scaler is not used. Empirically found that the model without scaler occasionally raise error when it calls Cholesky decomposition operator in Kalman filtering.

Table 2: RMSE, MAPE, and Mean NQL by scaling method for DeepAR and DeepState models.

| Model                      | RMSE                 | MAPE                 | Mean NQL[0.1, 0.9]   |
|----------------------------|----------------------|----------------------|----------------------|
| DeepAR w/ mean scaler      | 81.37±2.60           | 0.303±0.013          | 0.140±0.008          |
| DeepAR w/ median scaler    | <b>81.06±1.07</b>    | <b>0.300±0.008</b>   | <b>0.139±0.006</b>   |
| DeepAR w/o scaler          | 94.08±1.59           | 0.308±0.005          | 0.162±0.007          |
| DeepState w/ mean Scaler   | <b>87.88 ± 11.00</b> | <b>0.342 ± 0.022</b> | <b>0.169 ± 0.028</b> |
| DeepState w/ median scaler | 114.68 ± 124.45      | 0.365 ± 0.118        | 0.211 ± 0.140        |
| DeepState w/o scaler       | 150.91 ± 101.84      | 0.671 ± 0.297        | 0.427 ± 0.238        |

Table 3: RMSE, MAPE, and Mean NQL by scaling method for DeepAR and DeepState models.

| Model                    | RMSE                   | MAPE                 | Mean NQL[0.1, 0.9]   |
|--------------------------|------------------------|----------------------|----------------------|
| DeepAR w/ 3-layer GRU    | 80.21 ± 0.34           | <b>0.288 ± 0.002</b> | <b>0.135 ± 0.002</b> |
| DeepAR w/ 5-layer GRU    | <b>79.91 ± 0.40</b>    | 0.294 ± 0.007        | 0.136 ± 0.001        |
| DeepState w/ 3-layer GRU | 120.45 ± 89.05         | 0.467 ± 0.268        | 0.271 ± 0.210        |
| DeepState w/ 5-layer GRU | <b>115.20 ± 103.49</b> | <b>0.450 ± 0.203</b> | <b>0.266 ± 0.182</b> |

Table 4: RMSE, MAPE, and Mean NQL by output distribution for DeepAR models.

| Model                              | RMSE              | MAPE               | Mean NQL[0.1, 0.9] |
|------------------------------------|-------------------|--------------------|--------------------|
| DeepAR w/ Gaussian output          | <b>80.50±0.87</b> | 0.297±0.004        | 0.140±0.006        |
| DeepAR w/ Negative Binomial output | 80.87±1.27        | <b>0.296±0.008</b> | <b>0.138±0.006</b> |

Table 5: RMSE, MAPE, and Mean NQL by SSM architecture for DeepState models.

| Model                                 | RMSE                 | MAPE                 | Mean NQL[0.1, 0.9]   |
|---------------------------------------|----------------------|----------------------|----------------------|
| DeepState w/ partially-learnable SSMs | <b>93.83 ± 11.51</b> | <b>0.373 ± 0.077</b> | <b>0.200 ± 0.042</b> |
| DeepState w/ fully-learnable SSMs     | 141.82 ± 131.80      | 0.545 ± 0.304        | 0.338 ± 0.256        |

Table 6: RMSE, MAPE, and Mean NQL by the seasonality modes for Prophet models.

| Model                                 | RMSE                | MAPE                 | Mean NQL[0.1, 0.9]   |
|---------------------------------------|---------------------|----------------------|----------------------|
| Prophet w/ additive seasonality       | <b>83.89 ± 1.98</b> | 0.461 ± 0.038        | <b>0.202 ± 0.009</b> |
| Prophet w/ multiplicative seasonality | 97.02 ± 16.85       | <b>0.460 ± 0.044</b> | 0.222 ± 0.010        |

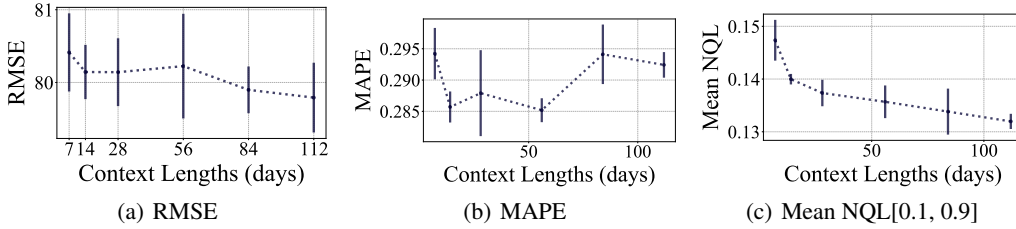

Figure 3: RMSE, MAPE, and Mean NQL by the context lengths for DeepAR models.

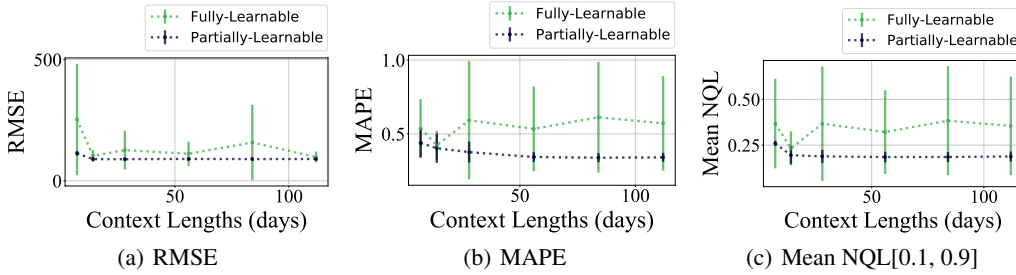

Figure 4: RMSE, MAPE, and Mean NQL by the context lengths for DeepState models.

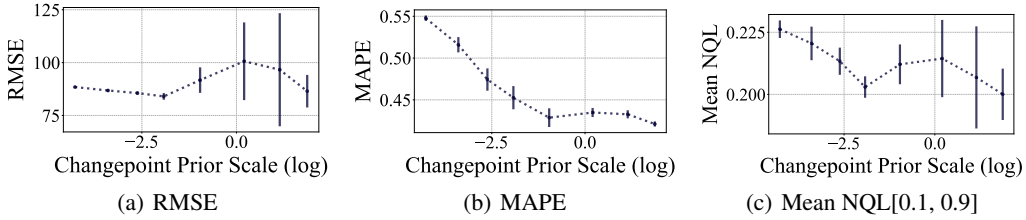

Figure 5: RMSE, MAPE, and Mean NQL by the changepoint prior scales for Prophet models.

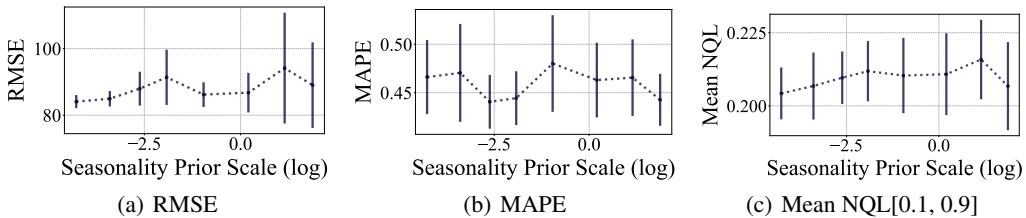

Figure 6: RMSE, MAPE, and Mean NQL by the seasonality prior scales for Prophet models.
